# Supplementary material for: Functional Requirements for Virtual Home Visit Simulation Platforms: A Qualitative Study Among Students, Instructors, and Community Nurses Based on Peplau's Theory
Source: Research Square preprint supplement (doi:10.21203/rs.3.rs-7503029/v1), 2025-10-08
Supplement: Supplementary file 1 [file ed11579c00af964df629ab25.docx]

**Supplementary Table Interview outlines**

| **Peplau's Interpersonal Relations Theory** | **Perspectives** | | |
| --- | --- | --- | --- |
| Orientation | Students | Professors | Community nurse |
|  | -In the initial patient encounter phase, what factors do you believe contribute to establishing effective communication? | -In your teaching experience, how could students be better guided to master core patient assessment skills? | -In your practice, what are the most common challenges encountered during home visit assessments? |
|  | -What are the main challenges you face when assessing patient needs? How might a platform help you overcome these challenges? | -How to maximize learning outcomes in assessment skills? | -What do you typically rely on to aid clinical decision-making? How could these experiences be incorporated into a simulation platform? |
| Identification | -When developing nursing care plans, what kind of support or guidance would you find most helpful？ | -What common difficulties have you observed among students during the nursing care planning process？ | -In the community setting, how to meet patients' different needs |
|  |  | -How do you think students' awareness of interdisciplinary collaboration could be better cultivated？ | -What do you find most critical during the care planning phase？ |
| Exploitation | -What do you find most helpful for improving your nursing skills？ | -How do you think nursing skills could be more effectively demonstrated and taught？ | -How do you handle emergencies during home visits? Could you share some experiences？ |
|  |  | -In your view, what errors do students most commonly make during skill implementation? How could they be helped to improve？ | -How do you assess and monitor family members' involvement in care？ |
| Resolution | -What do you consider to be the key indicators for evaluating nursing effectiveness? | -How do you think students could be better guided to analyze and understand nursing outcomes？ | -In long-term follow-up, how do you primarily focus on to evaluate nursing effectiveness？ |
|  | -After completing care, how do you typically reflect on and summarize your performance？ |  | -How do you use evaluation results to continuously improve nursing quality? |
